# Supplementary material for: Dynamical changes of seismic properties prior to, during, and after 2014–2015 Holuhraun Eruption, Iceland
Source: Copernicus journal article supplement (doi:10.5194/egusphere-2024-1445), 2024-06-04
Supplement: Supplementary file 1 [file egusphere-2024-1445-supplement.pdf]

# Supporting Information

Maria R.P. Sudiby, Eva P.S. Eibl, Sebastian Hainzl, Matthias Ohrnberger

May 14, 2024

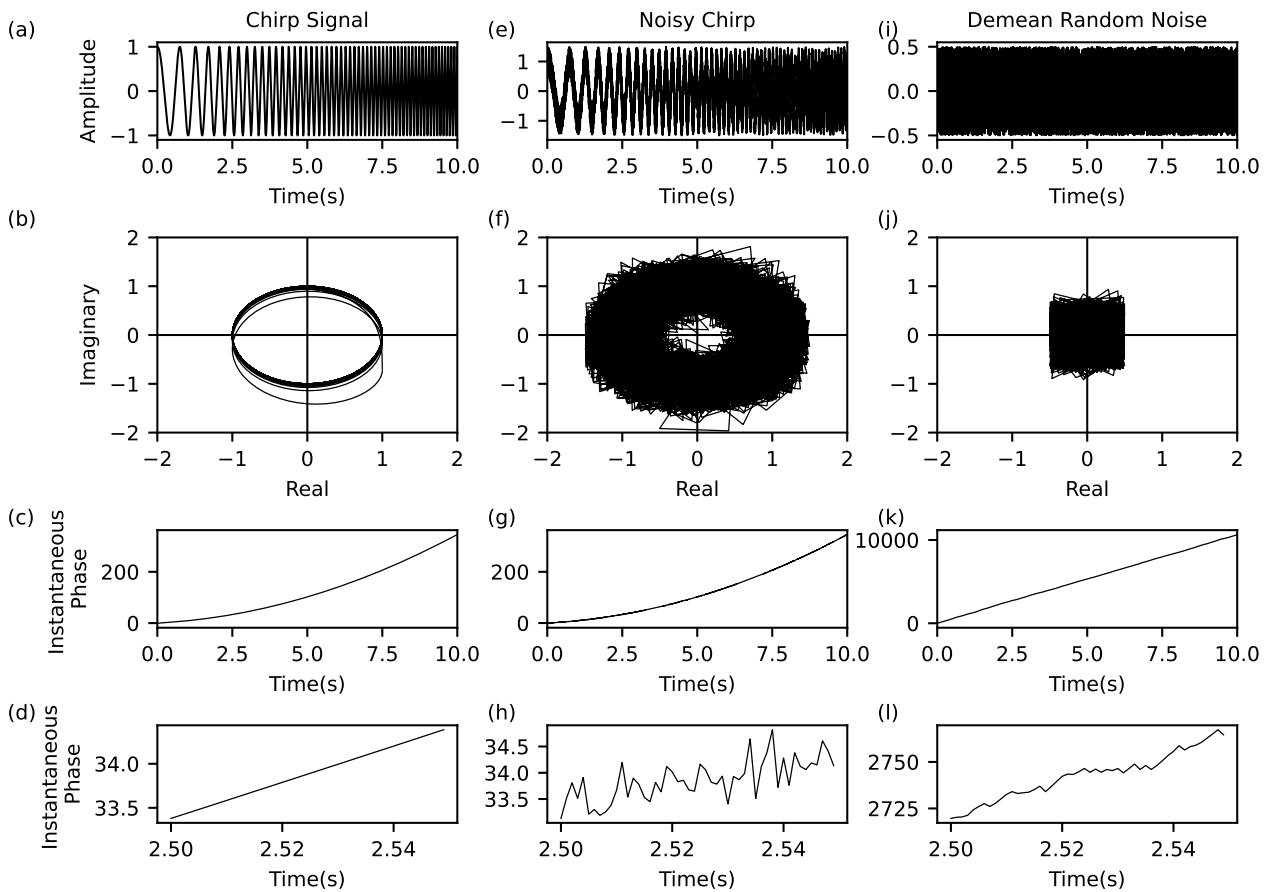

S 1: (a) Time series, (b) the analytical signal, (c) and the instantaneous phase (d) 0.5 s close up of the instantaneous phase for a synthetic chirp signal. (e-h) same as subfigure (a-d) for a noisy chirp and (i-l) same as subfigures (a-d) for noise.

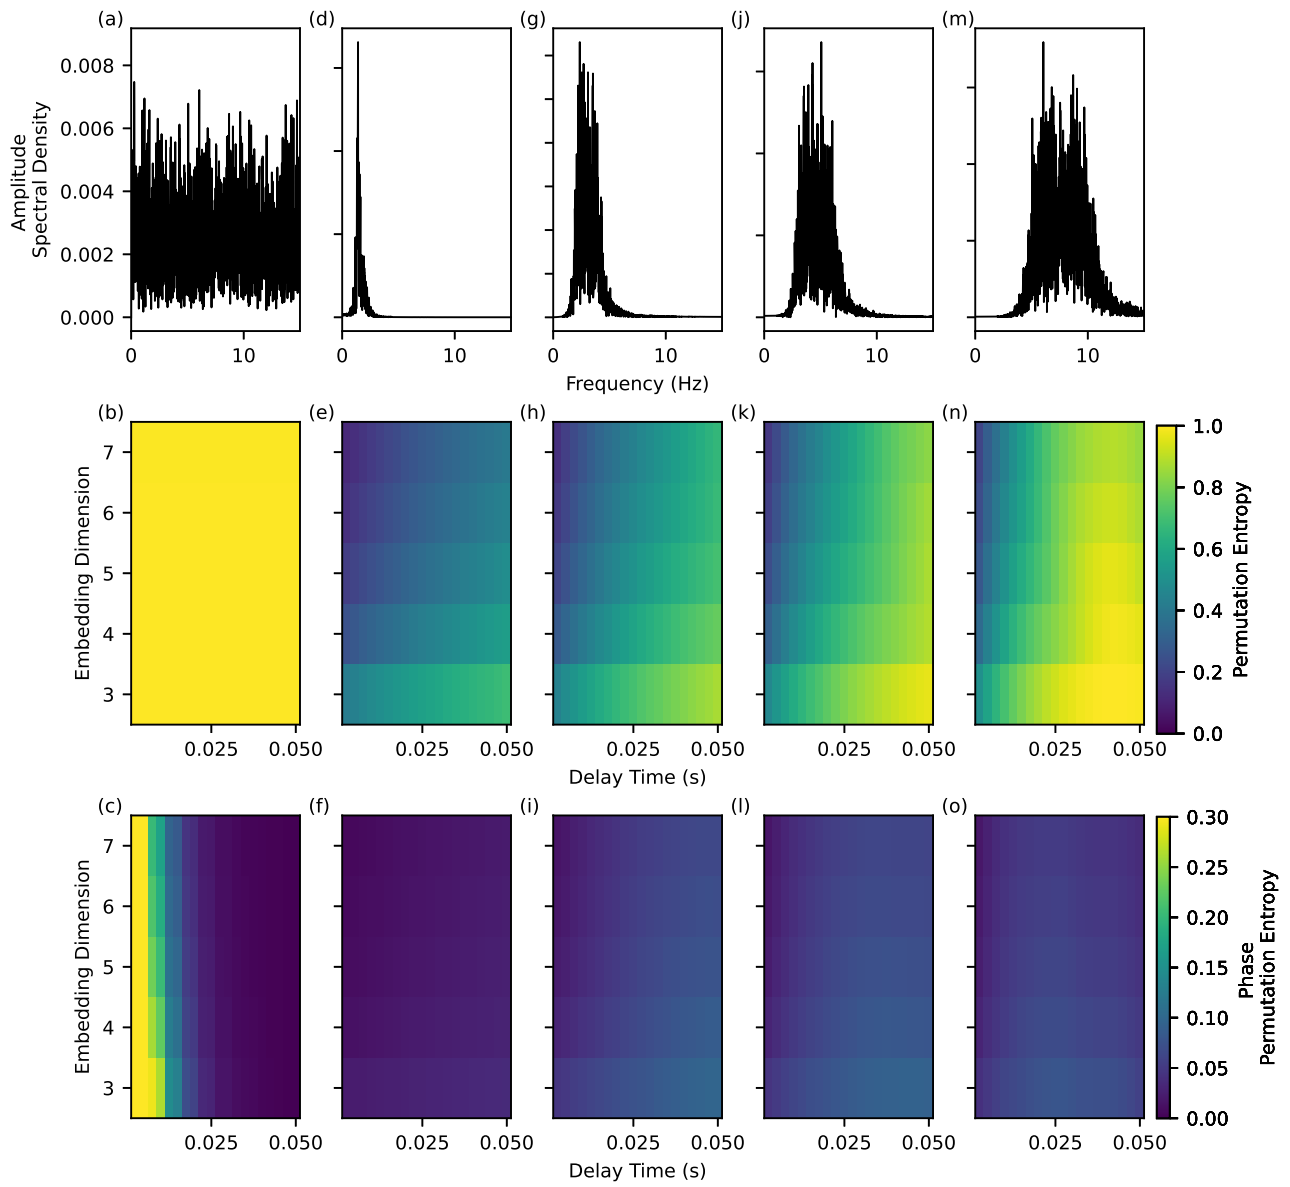

S 2: Noise in different frequencies spectrum and their corresponding PE and PPE, unfiltered random noise (a-c), 1-2 Hz (d-f), 2-4 Hz (g-i), 3-6 Hz (j-l), 5-10 Hz (m-o).

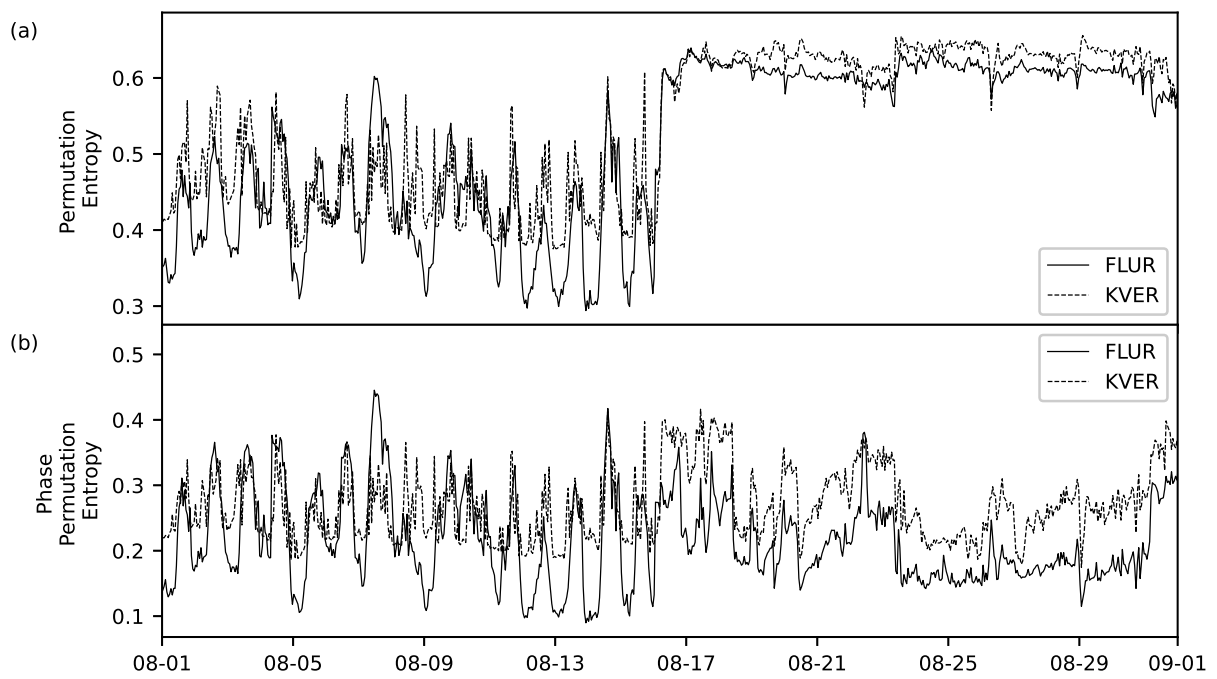

S 3: (a) PE and (b) PPE comparison between stations FLUR and KVER, both vertical components, bandpass-filtered from 0.5 to 10 Hz.

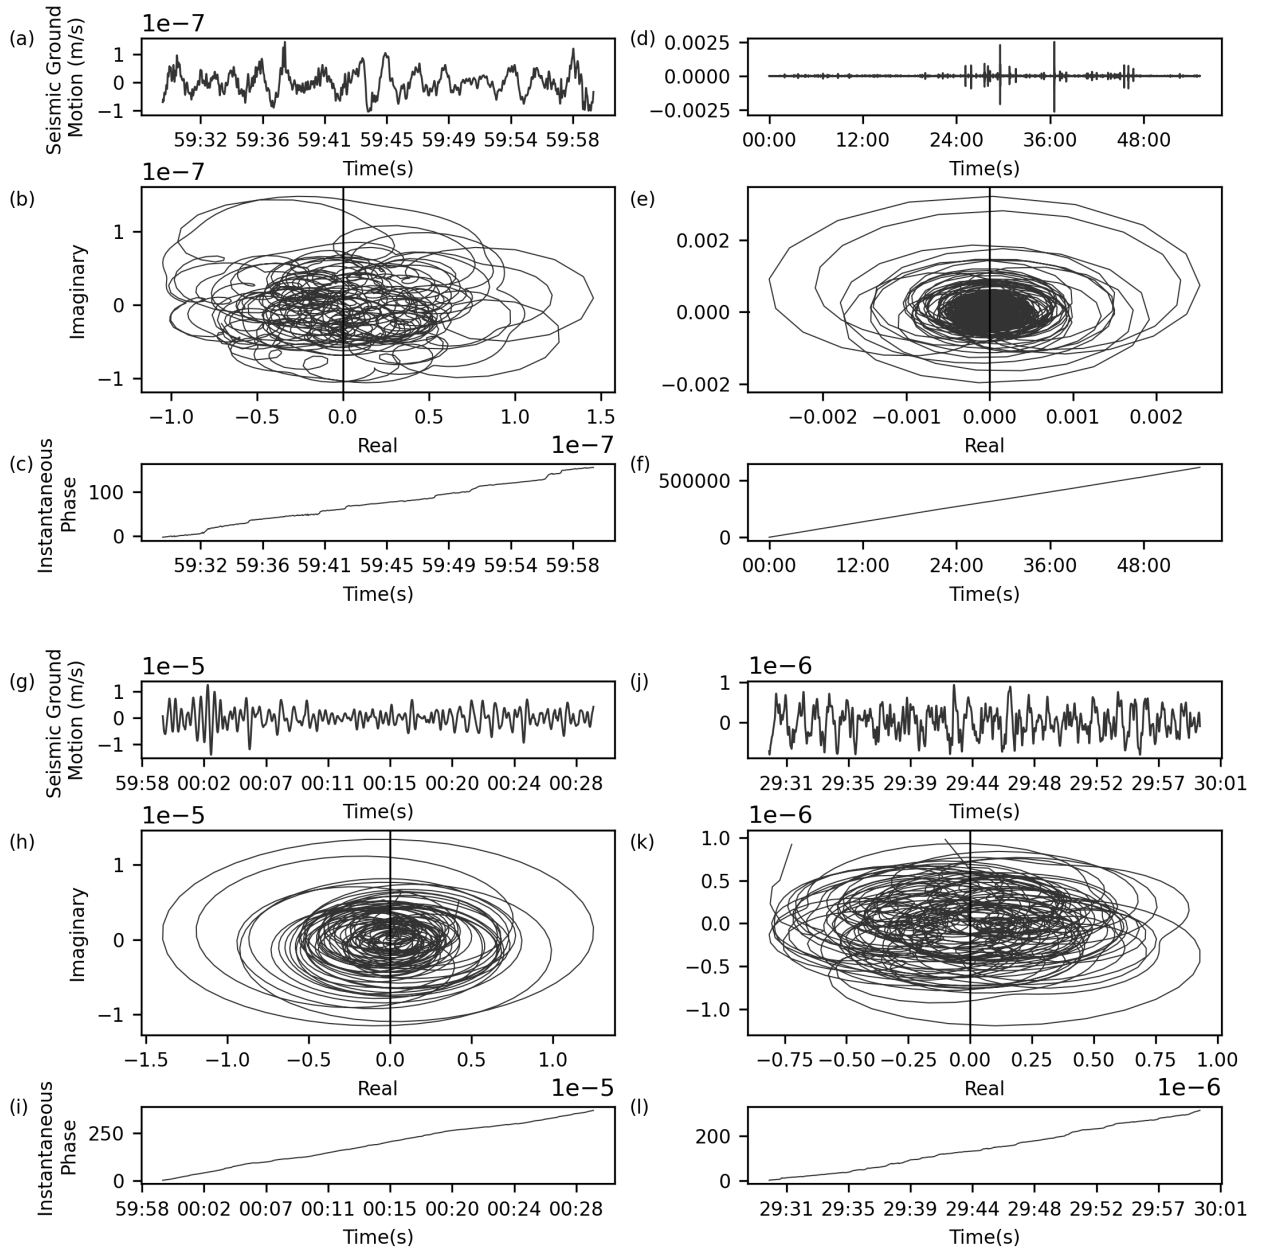

S 4: The comparison of the signal projection in the complex plane and its instantaneous phase for ambient noise on 17 June (a-c), VT events on 25 August (d-f), tremor on 3 September (g-i), and tremor on 10 September (j-l).

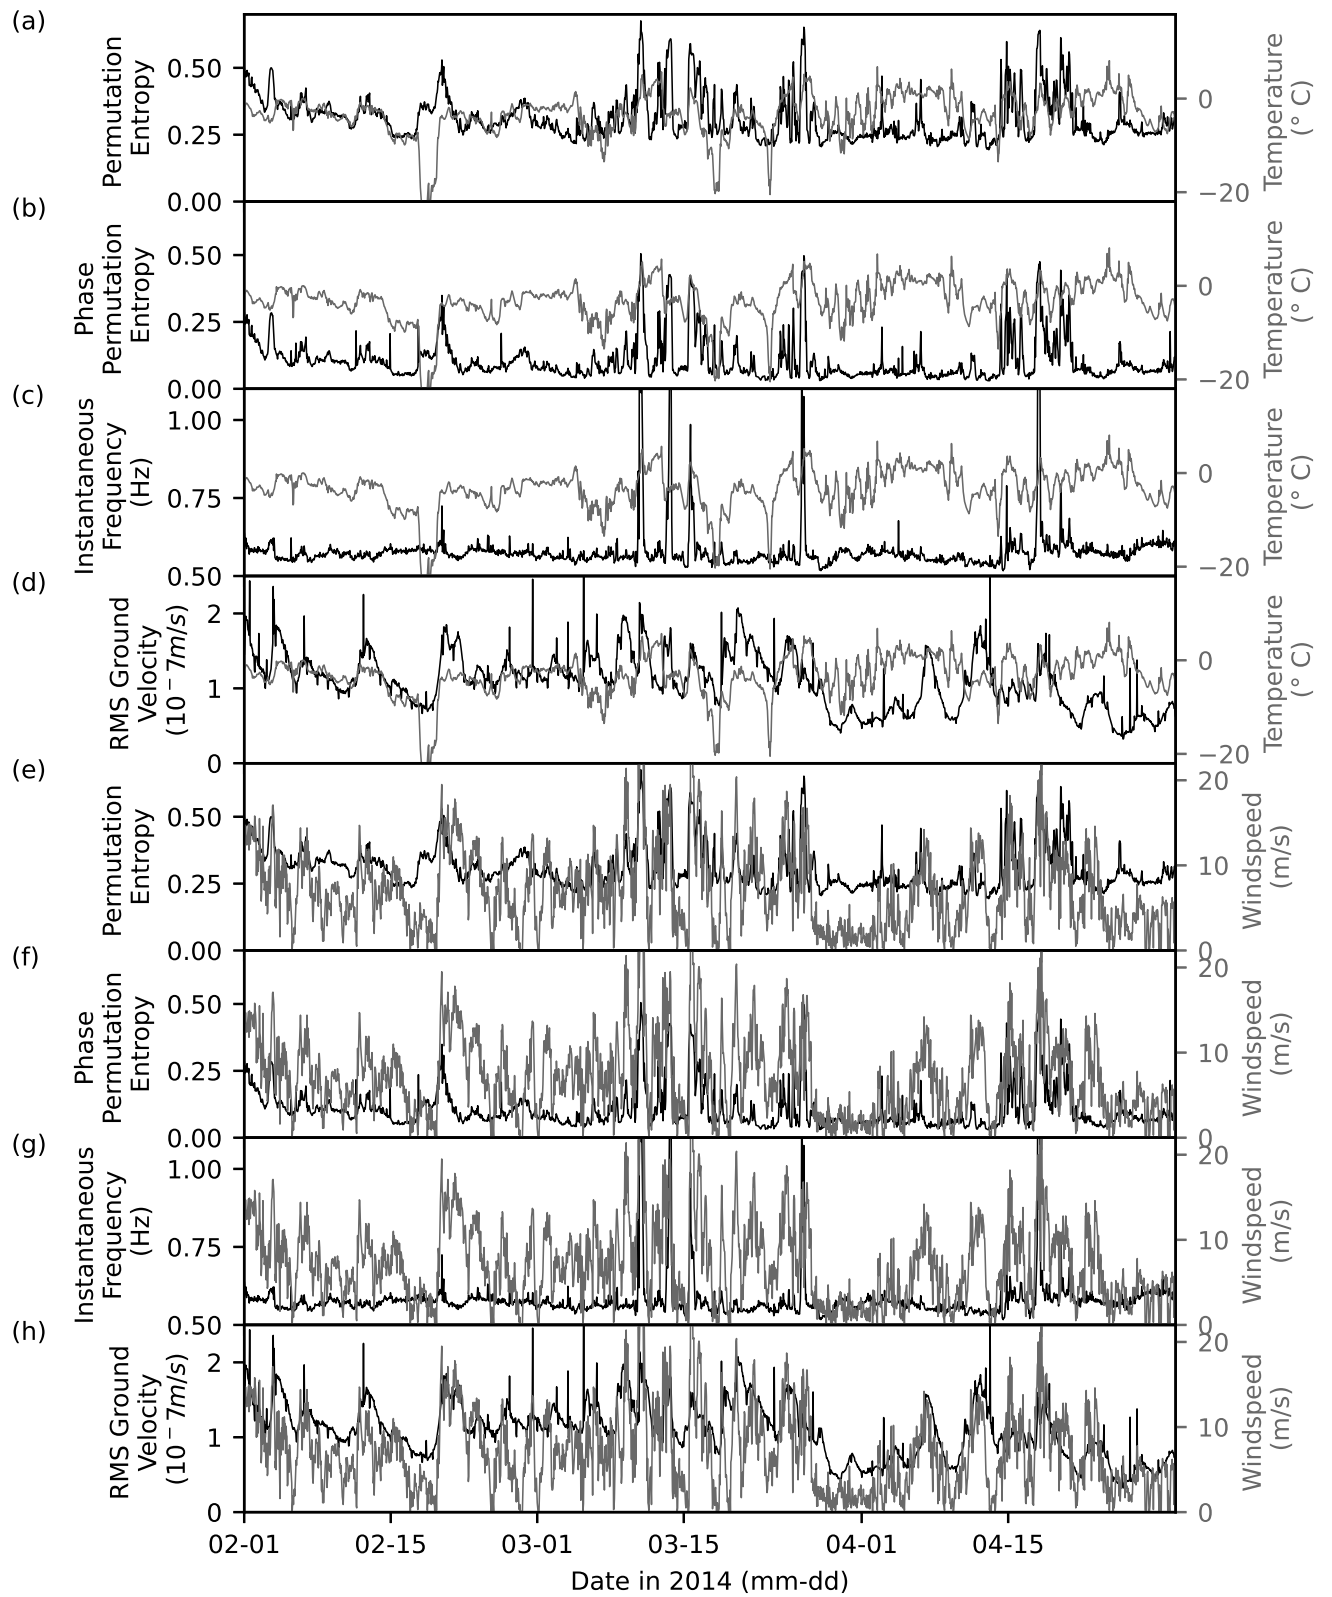

S 5: The comparison of air temperature with PE, PPE, IF, and RMS (a-d), and wind speed with the mentioned parameters (e-h) from February to April 2014.

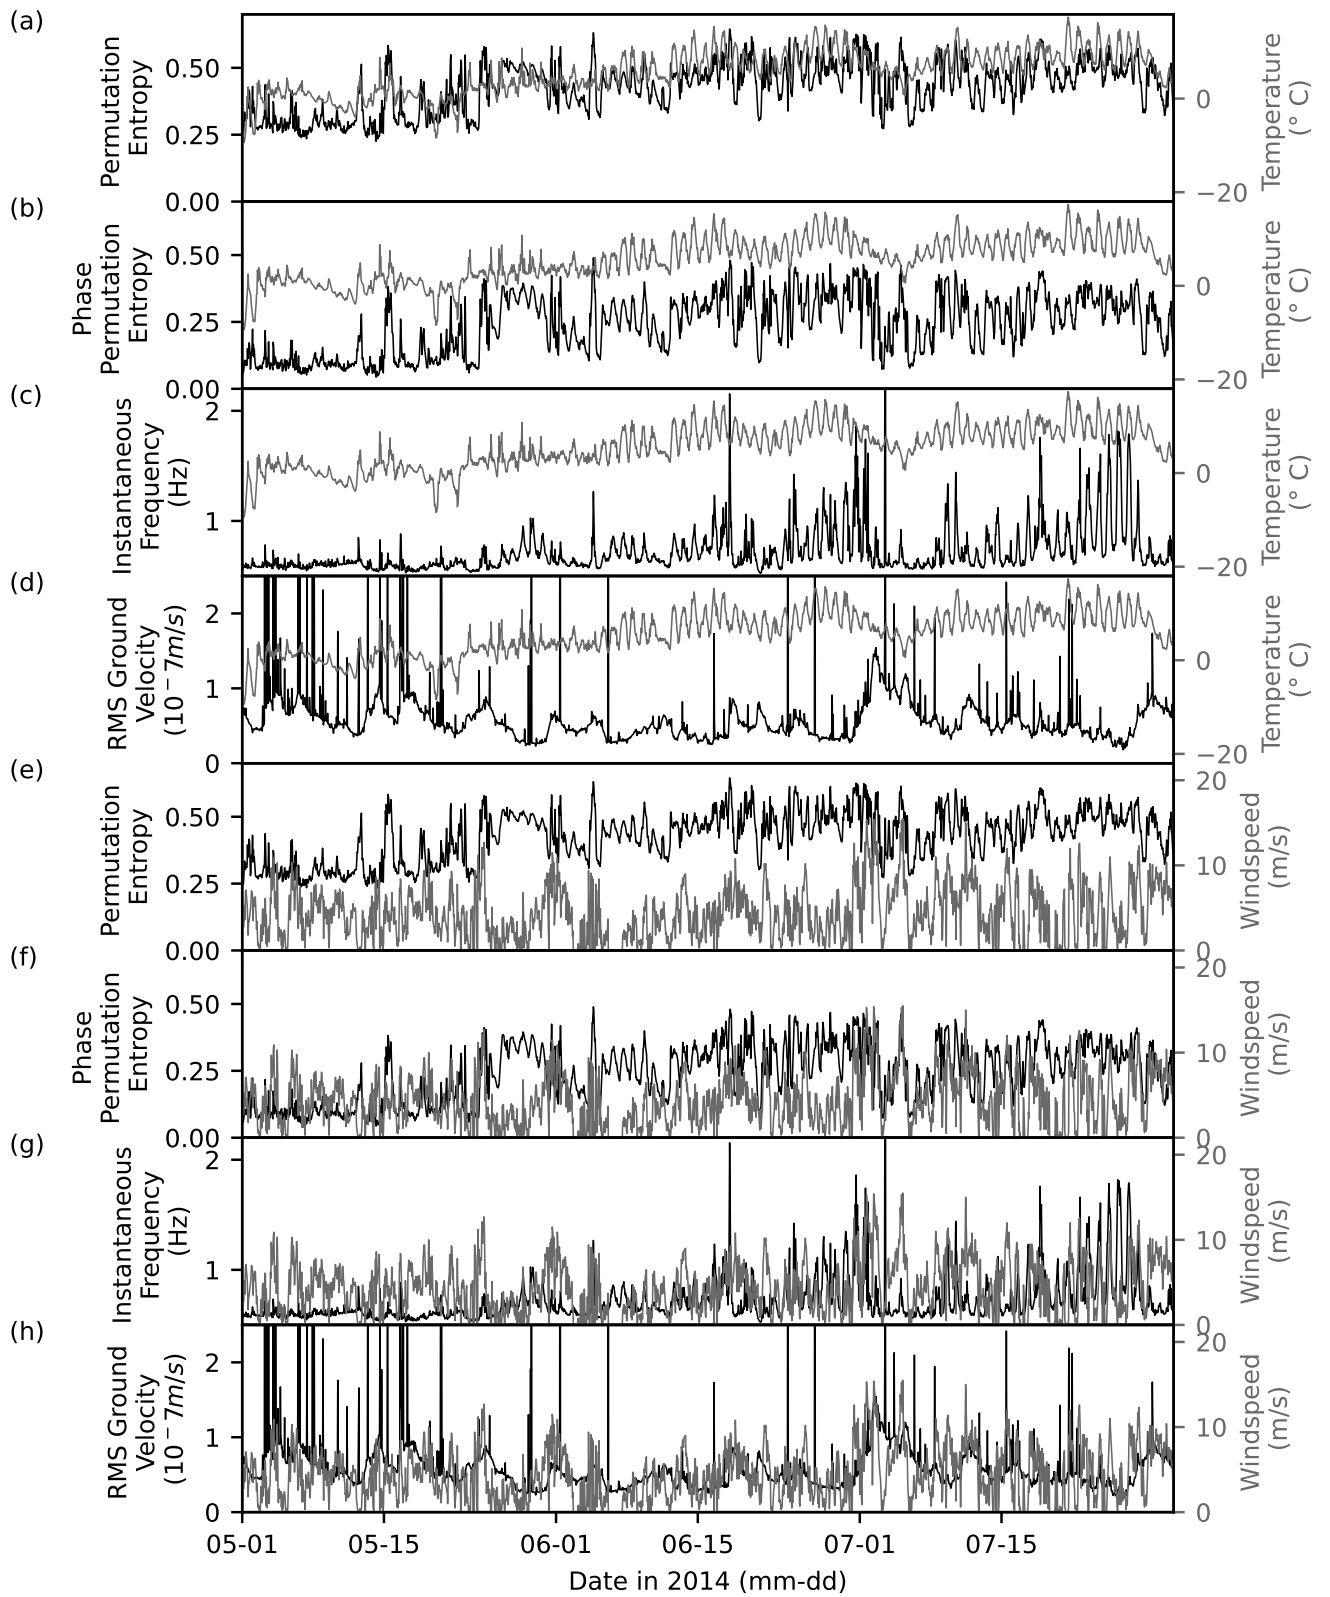

S 6: The comparison of air temperature with PE, PPE, IF, and RMS (a-d), and wind speed with the mentioned parameters (e-h) from May to July 2014.

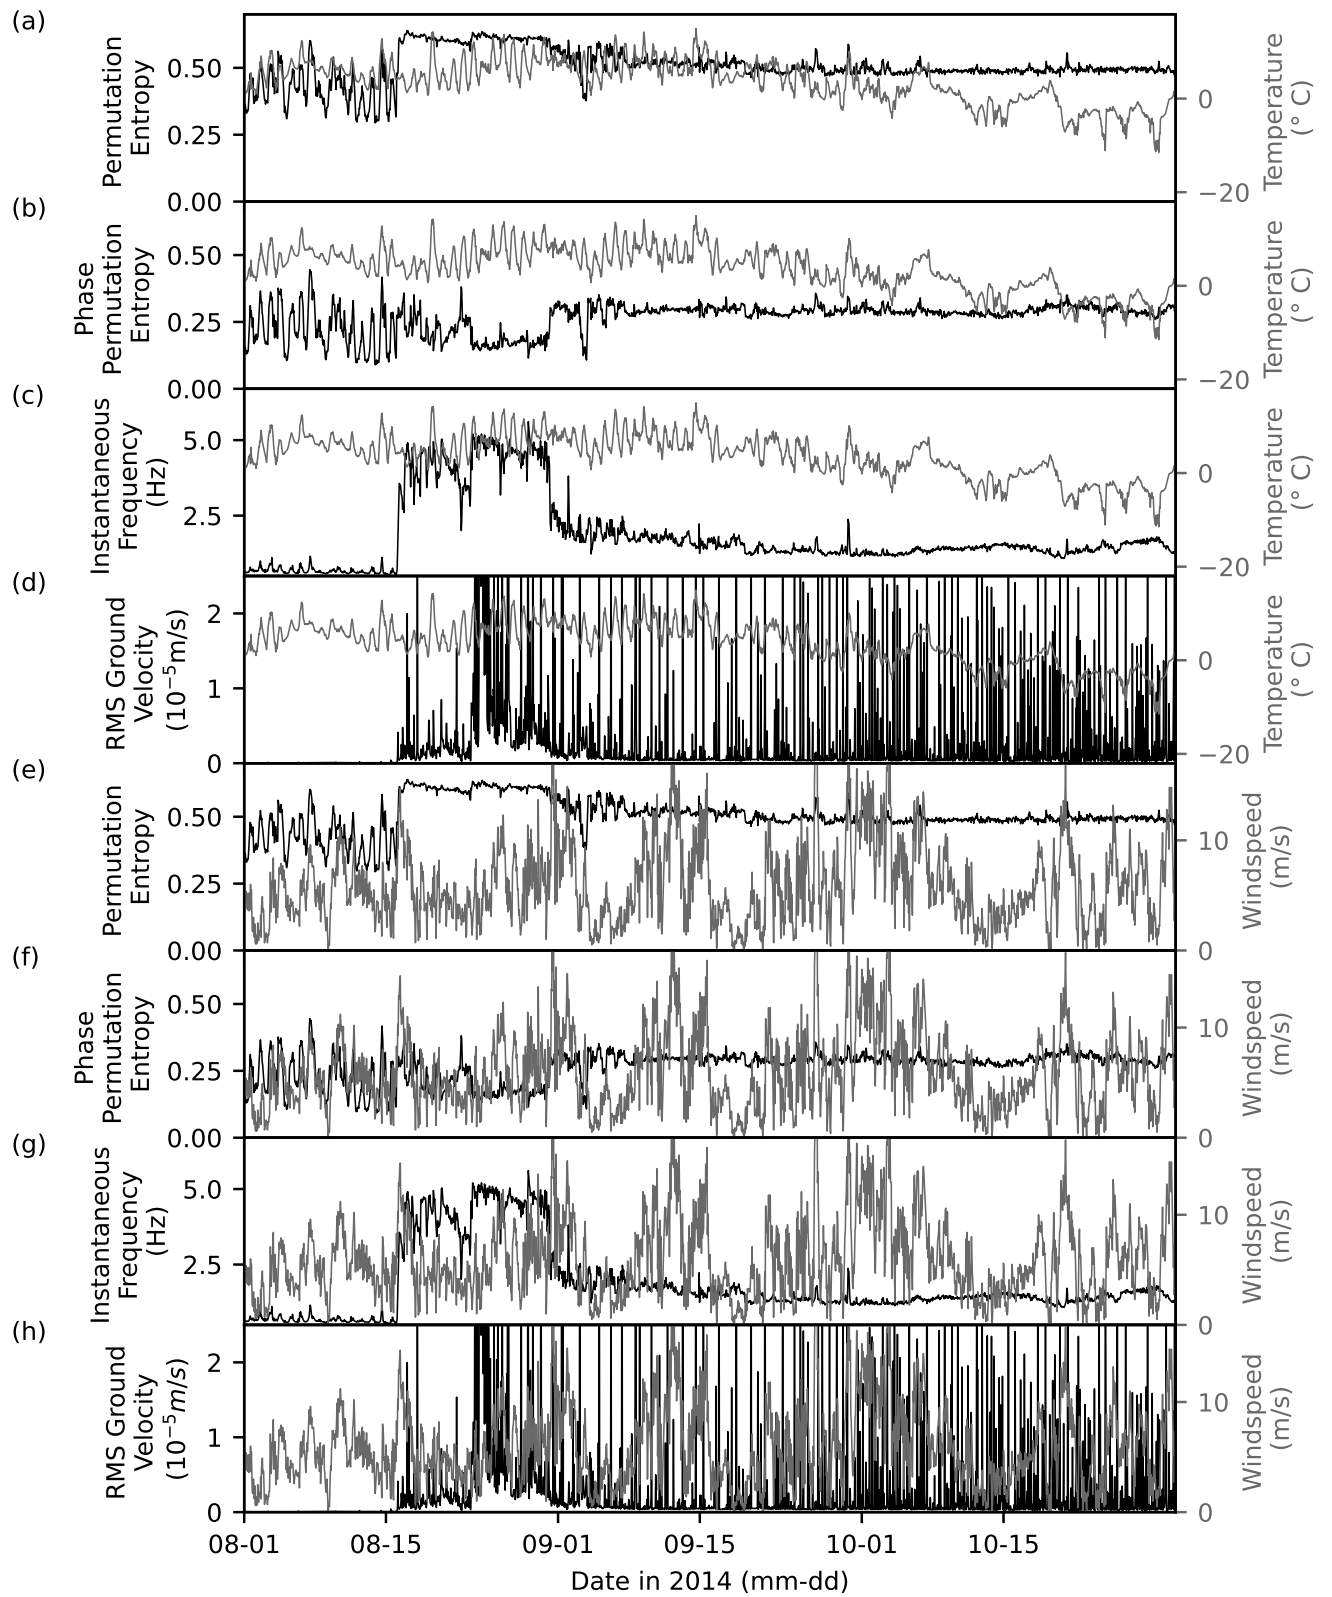

S 7: The comparison of air temperature with PE, PPE, IF, and RMS (a-d), and wind speed with the mentioned parameters (e-h) from August to October 2014.



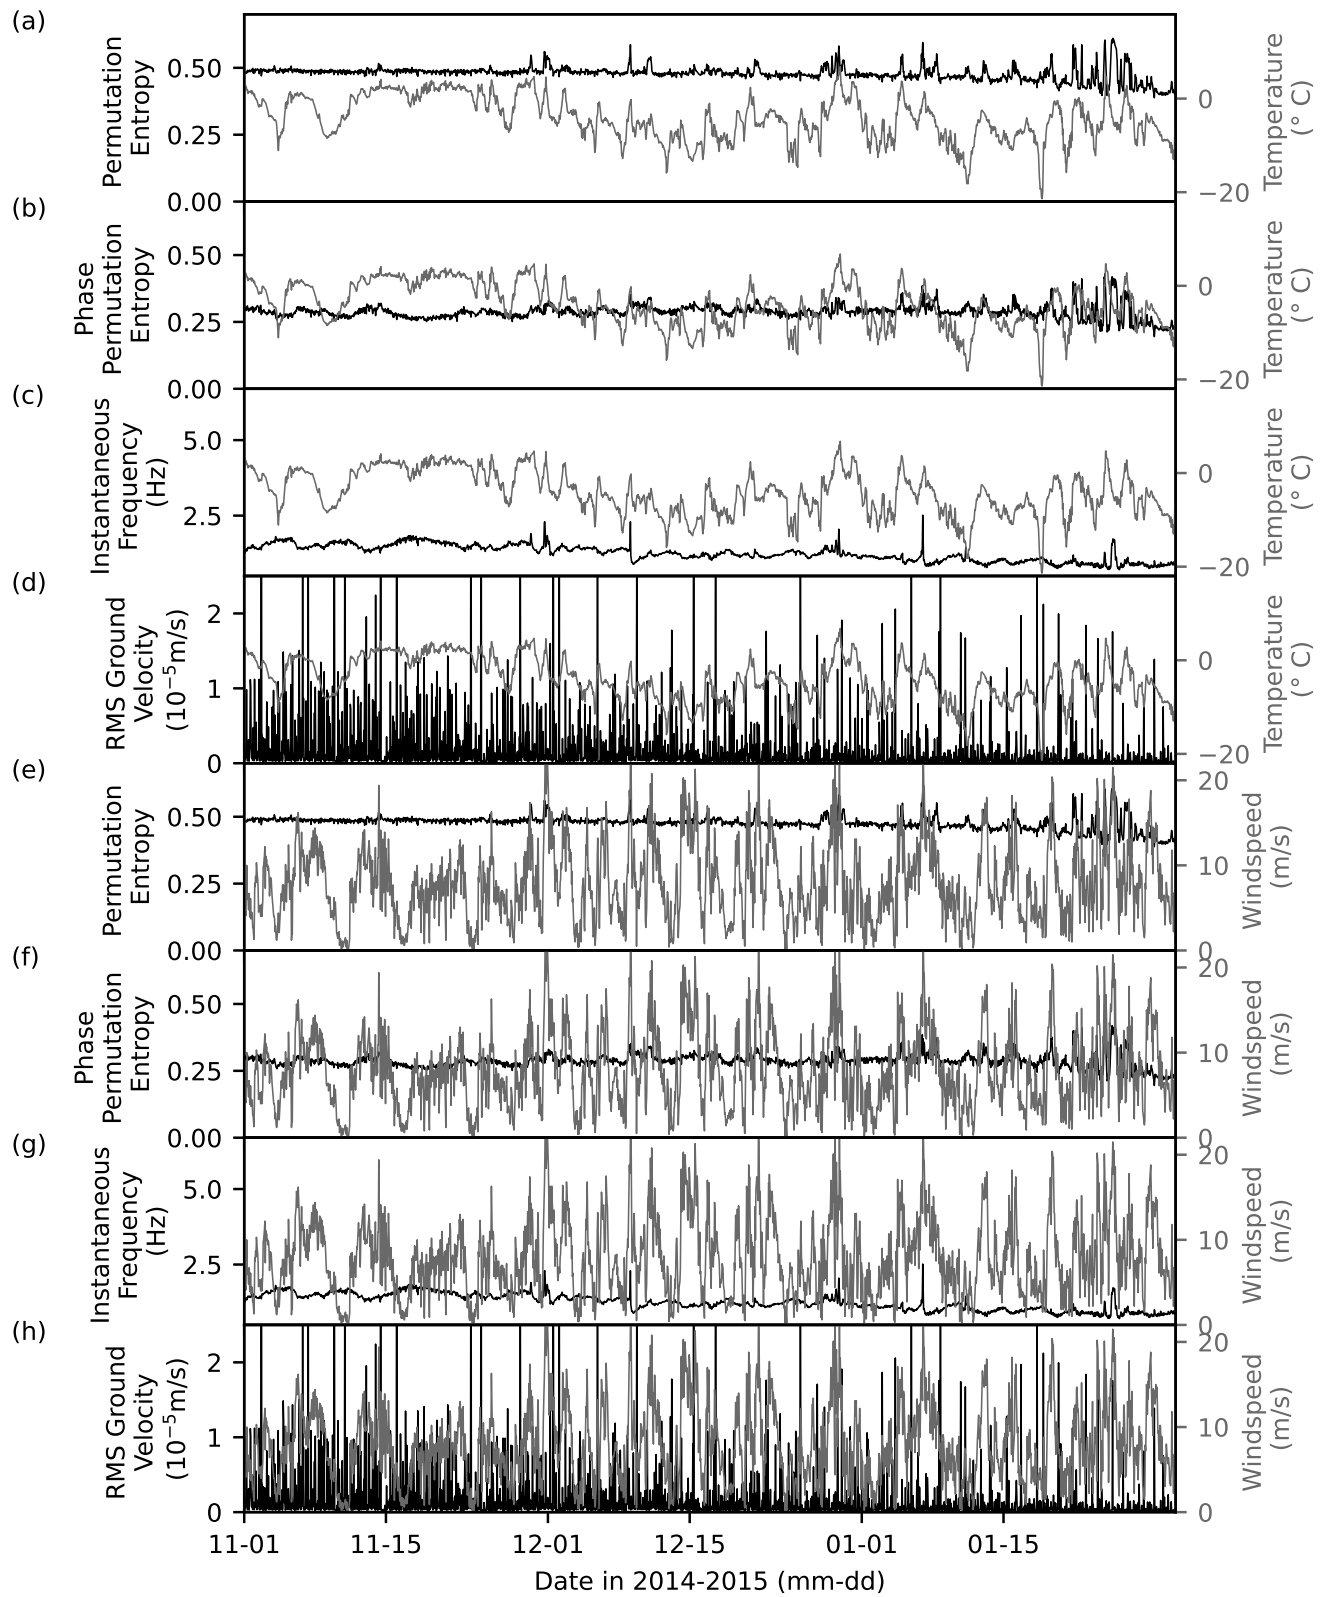

S 8: The comparison of air temperature with PE, PPE, IF, and RMS (a-d), and wind speed with the mentioned parameters (e-h) from November 2014 to January 2015.

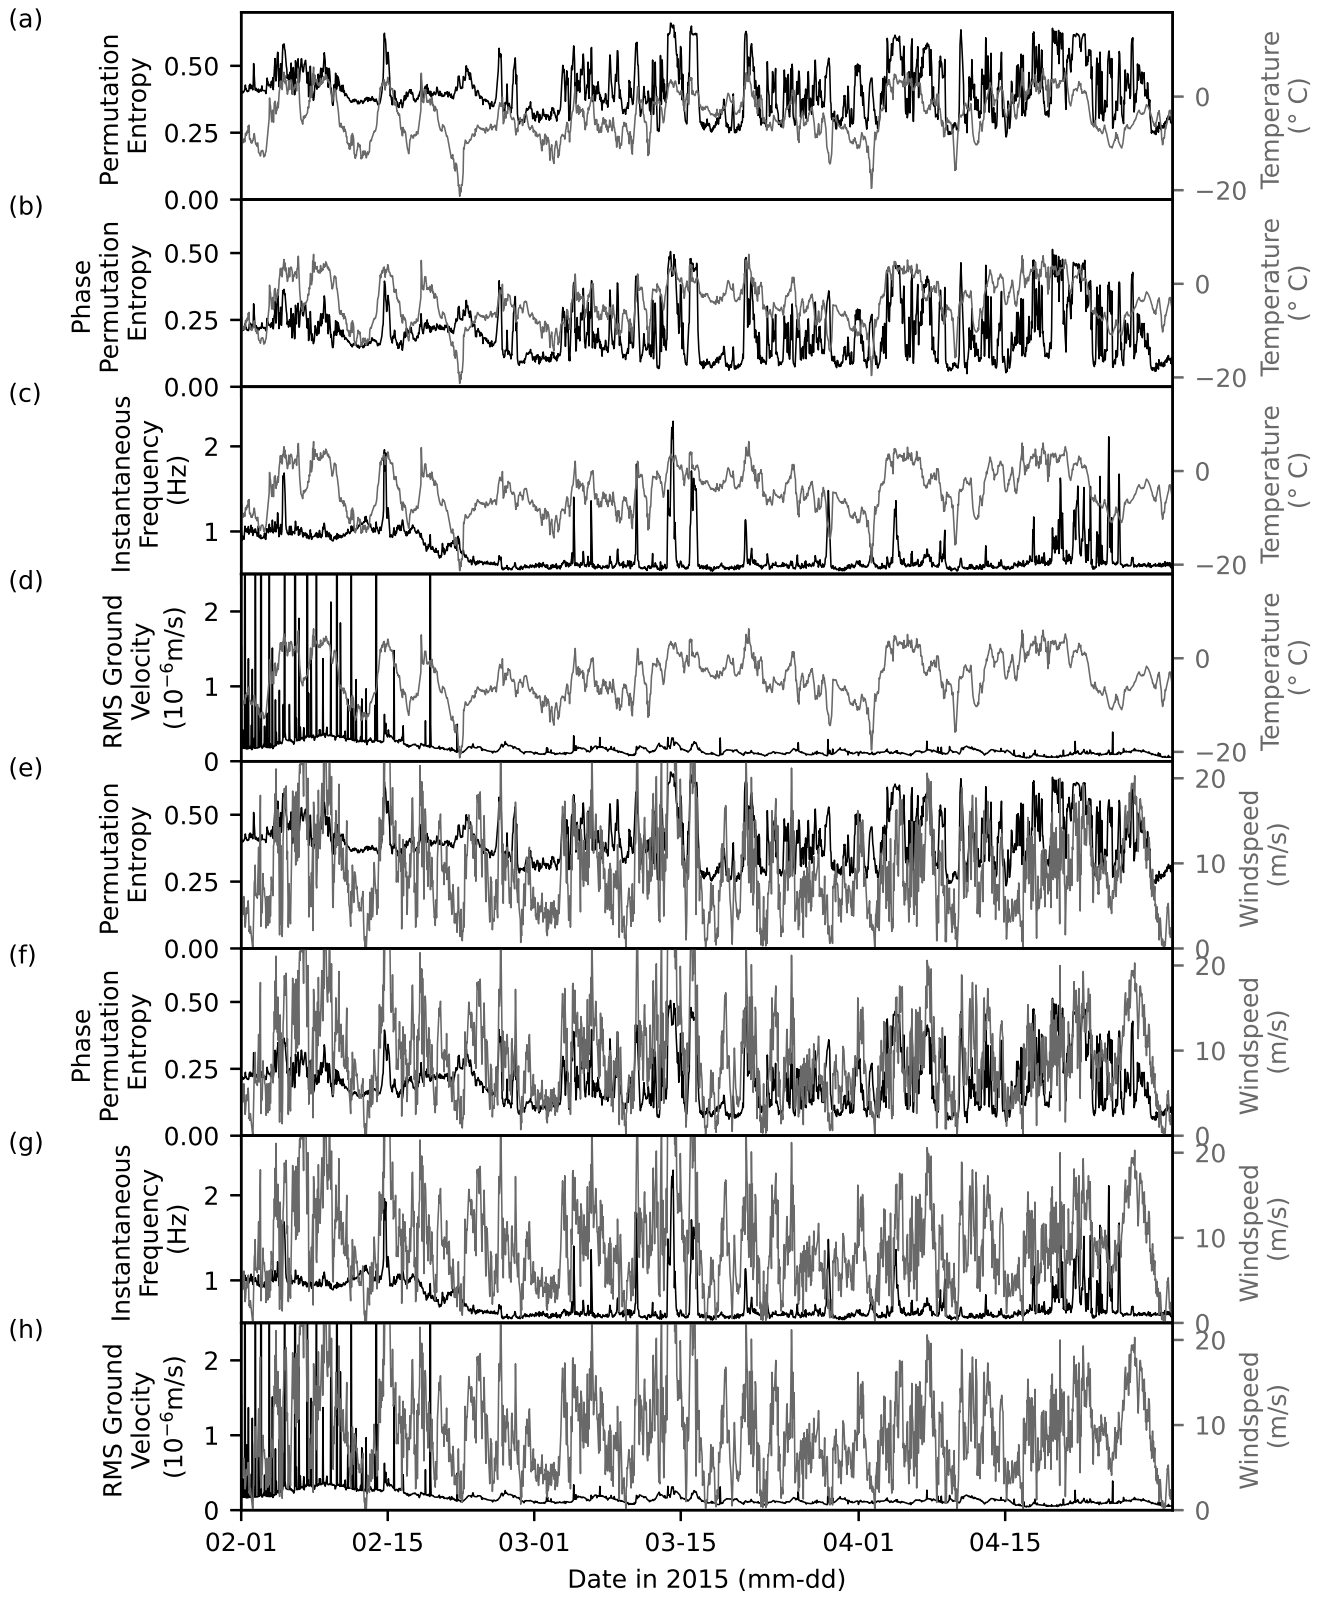

S 9: The comparison of air temperature with PE, PPE, IF, and RMS (a-d), and wind speed with the mentioned parameters (e-h) from February to April 2015.

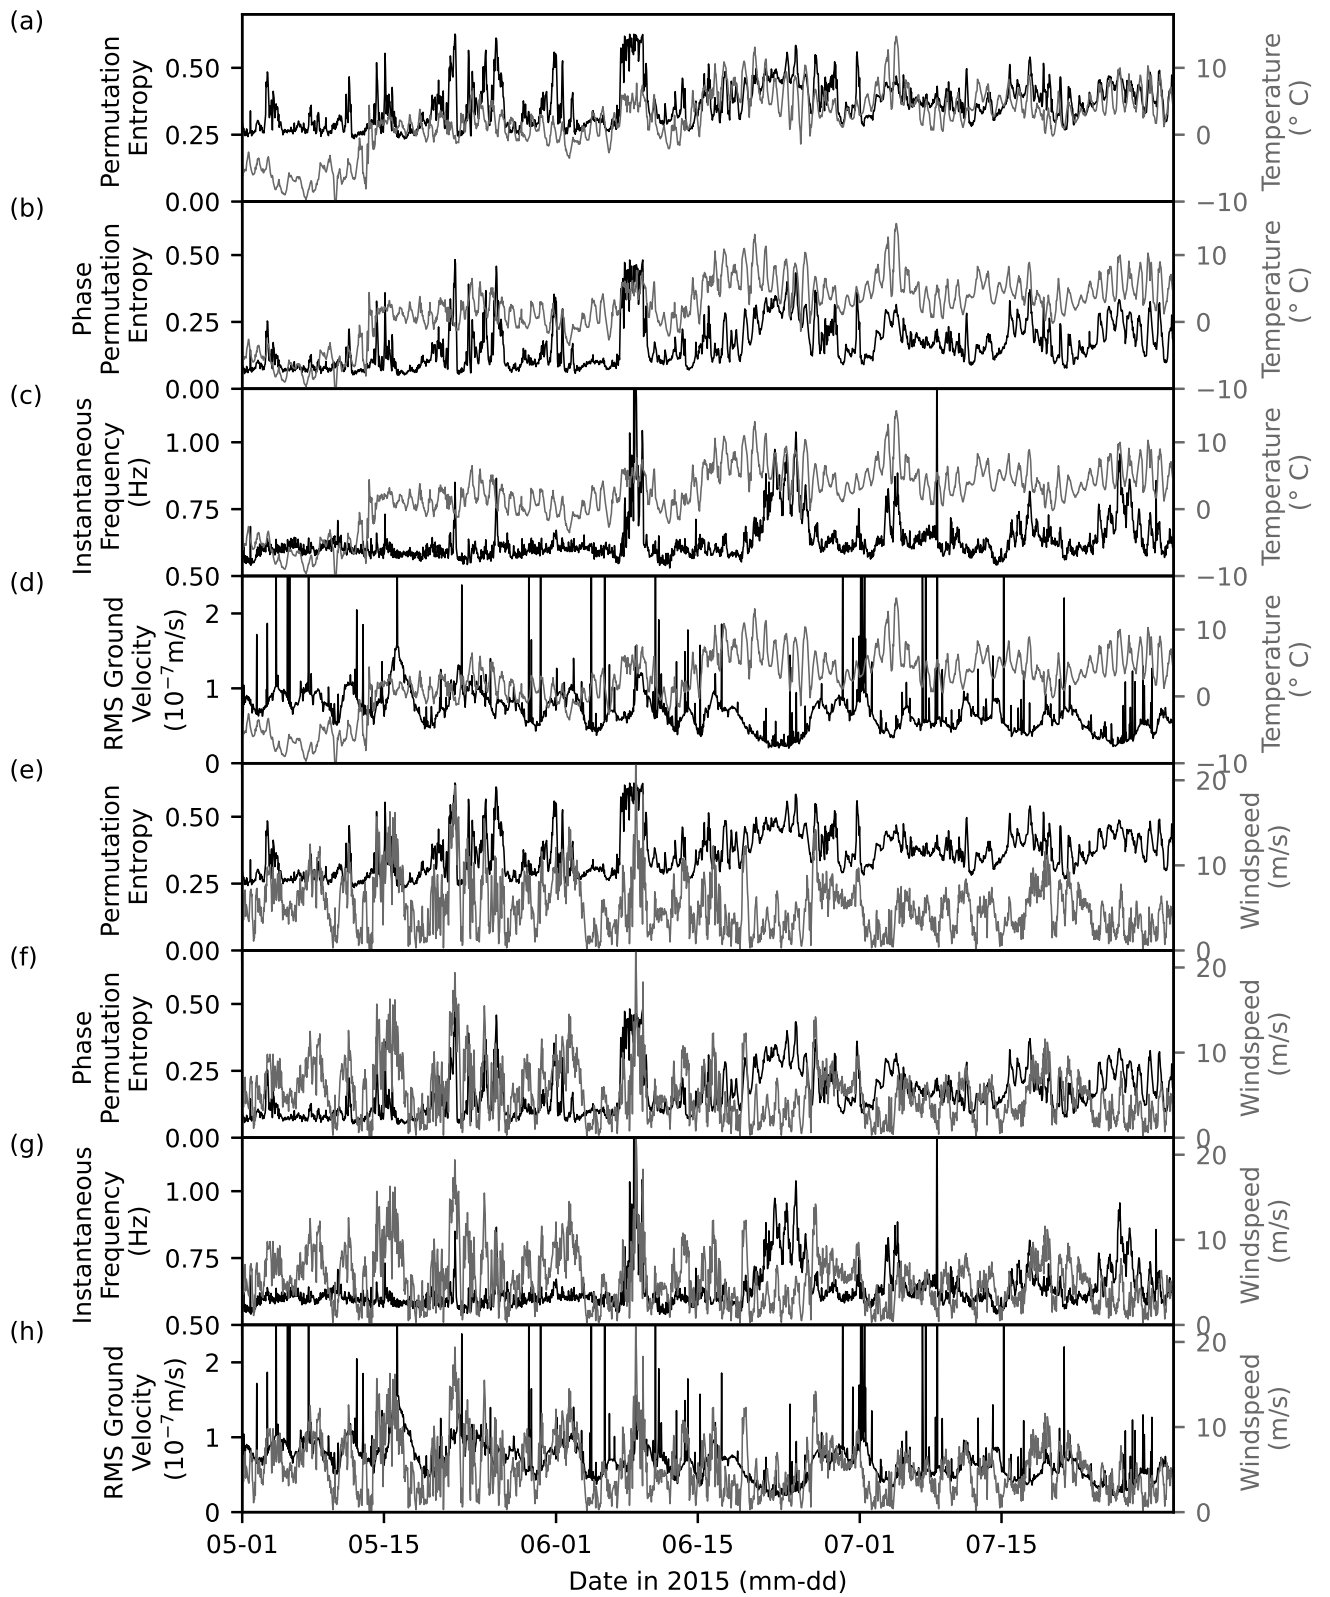

S 10: The comparison of air temperature with PE, PPE, IF, and RMS (a-d), and wind speed with the mentioned parameters (e-h) from May to July 2015.

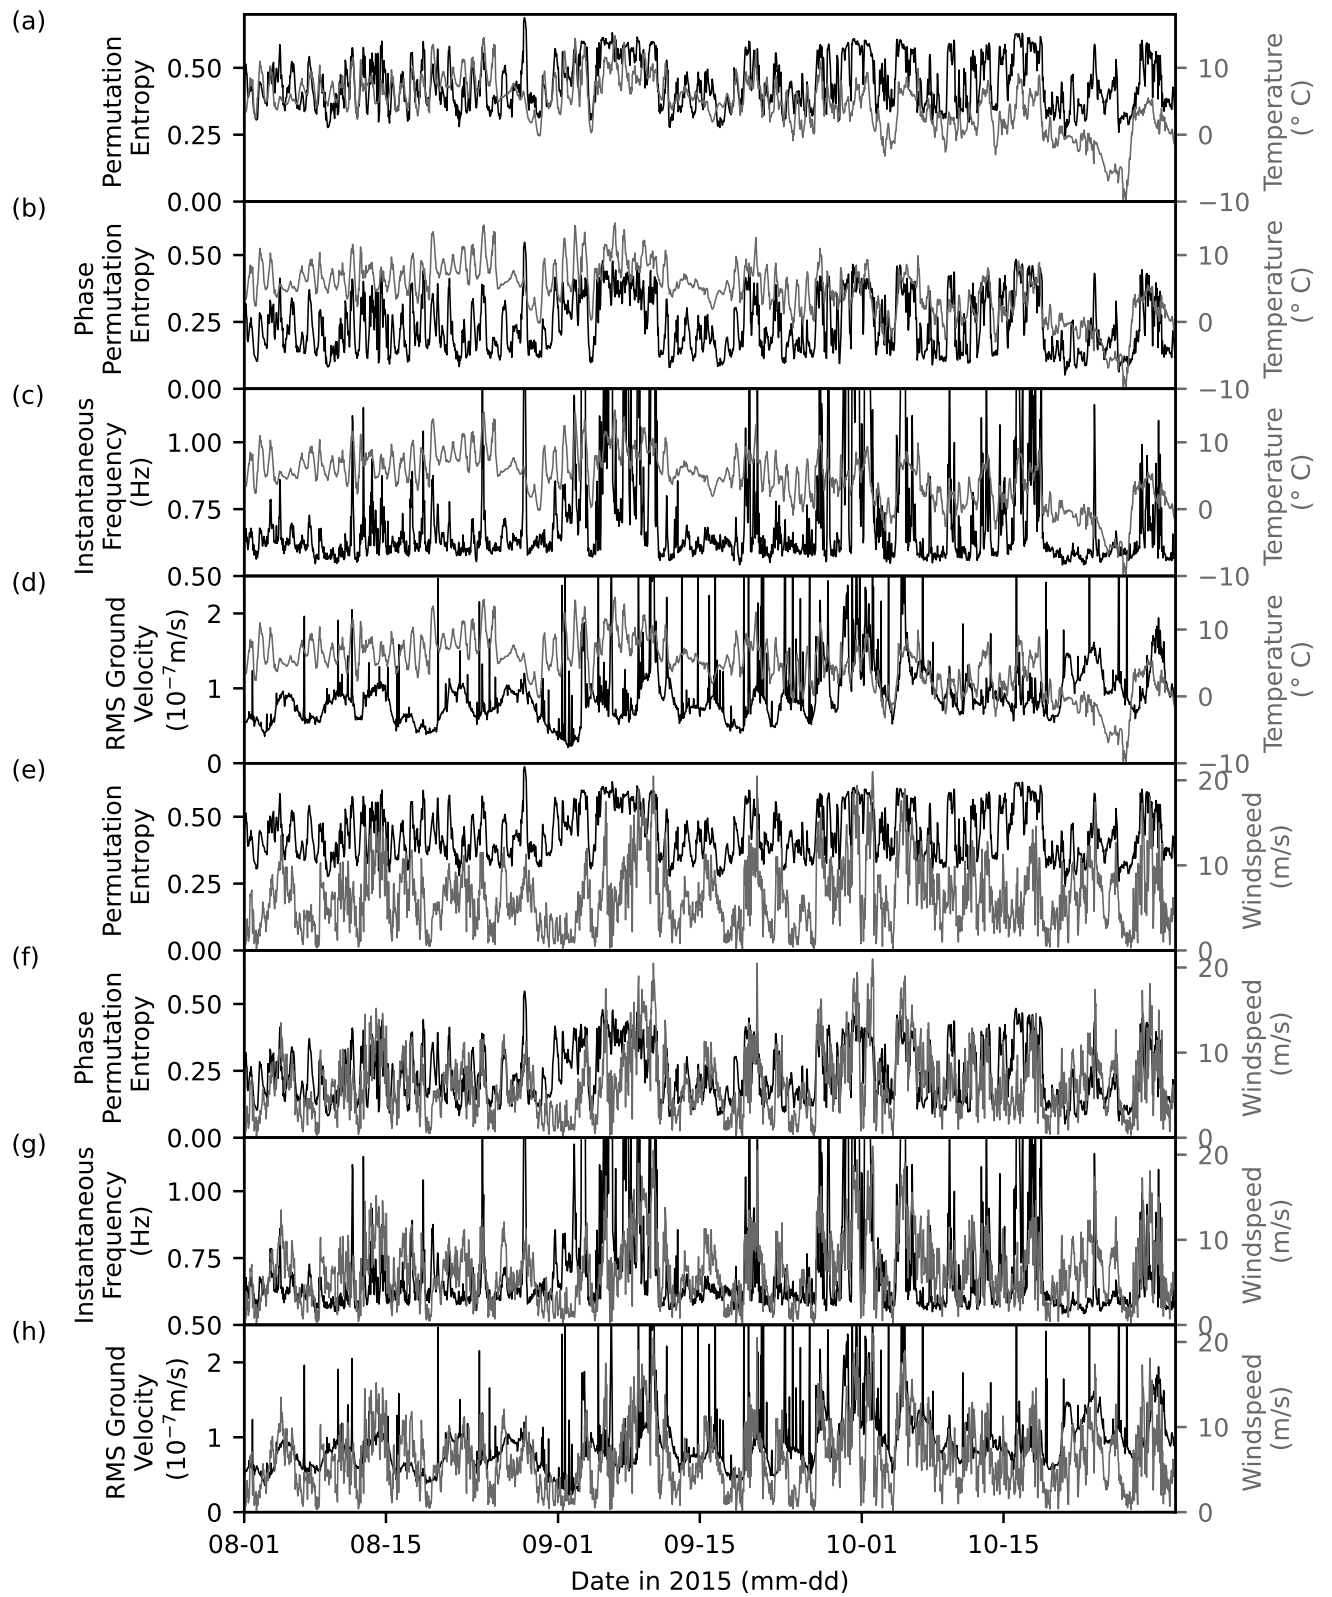

S 11: The comparison of air temperature with PE, PPE, IF, and RMS (a-d), and wind speed with the mentioned parameters (e-h) from August to October 2015.

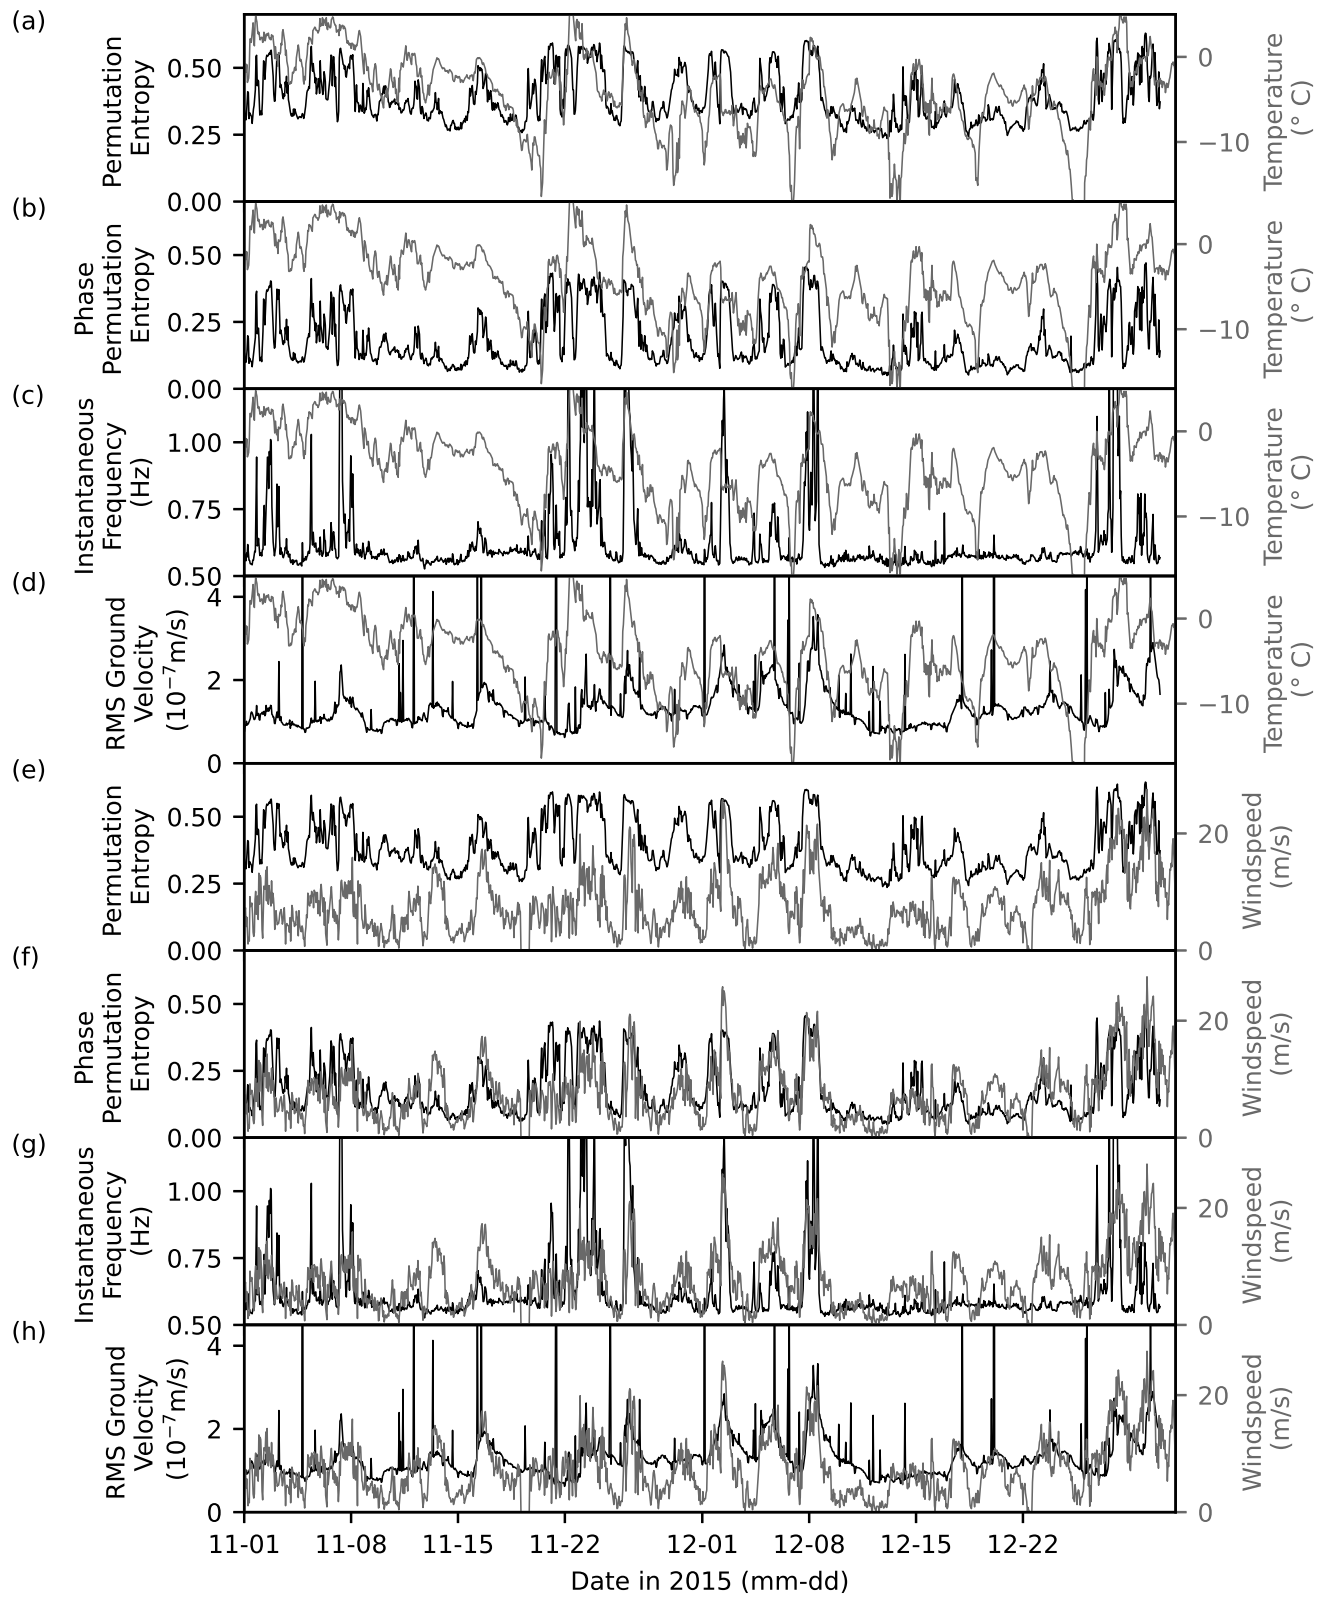

S 12: The comparison of air temperature with PE, PPE, IF, and RMS (a-d), and wind speed with the mentioned parameters (e-h) from November to December 2015.
